# Supplementary material for: Technical considerations when using the EEG export of the SEDLine Root device
Source: Springer Nature journal article supplement (doi:10.1007/s10877-020-00578-9), 2020-08-19
Supplement: MOESM1 [file 18297328]

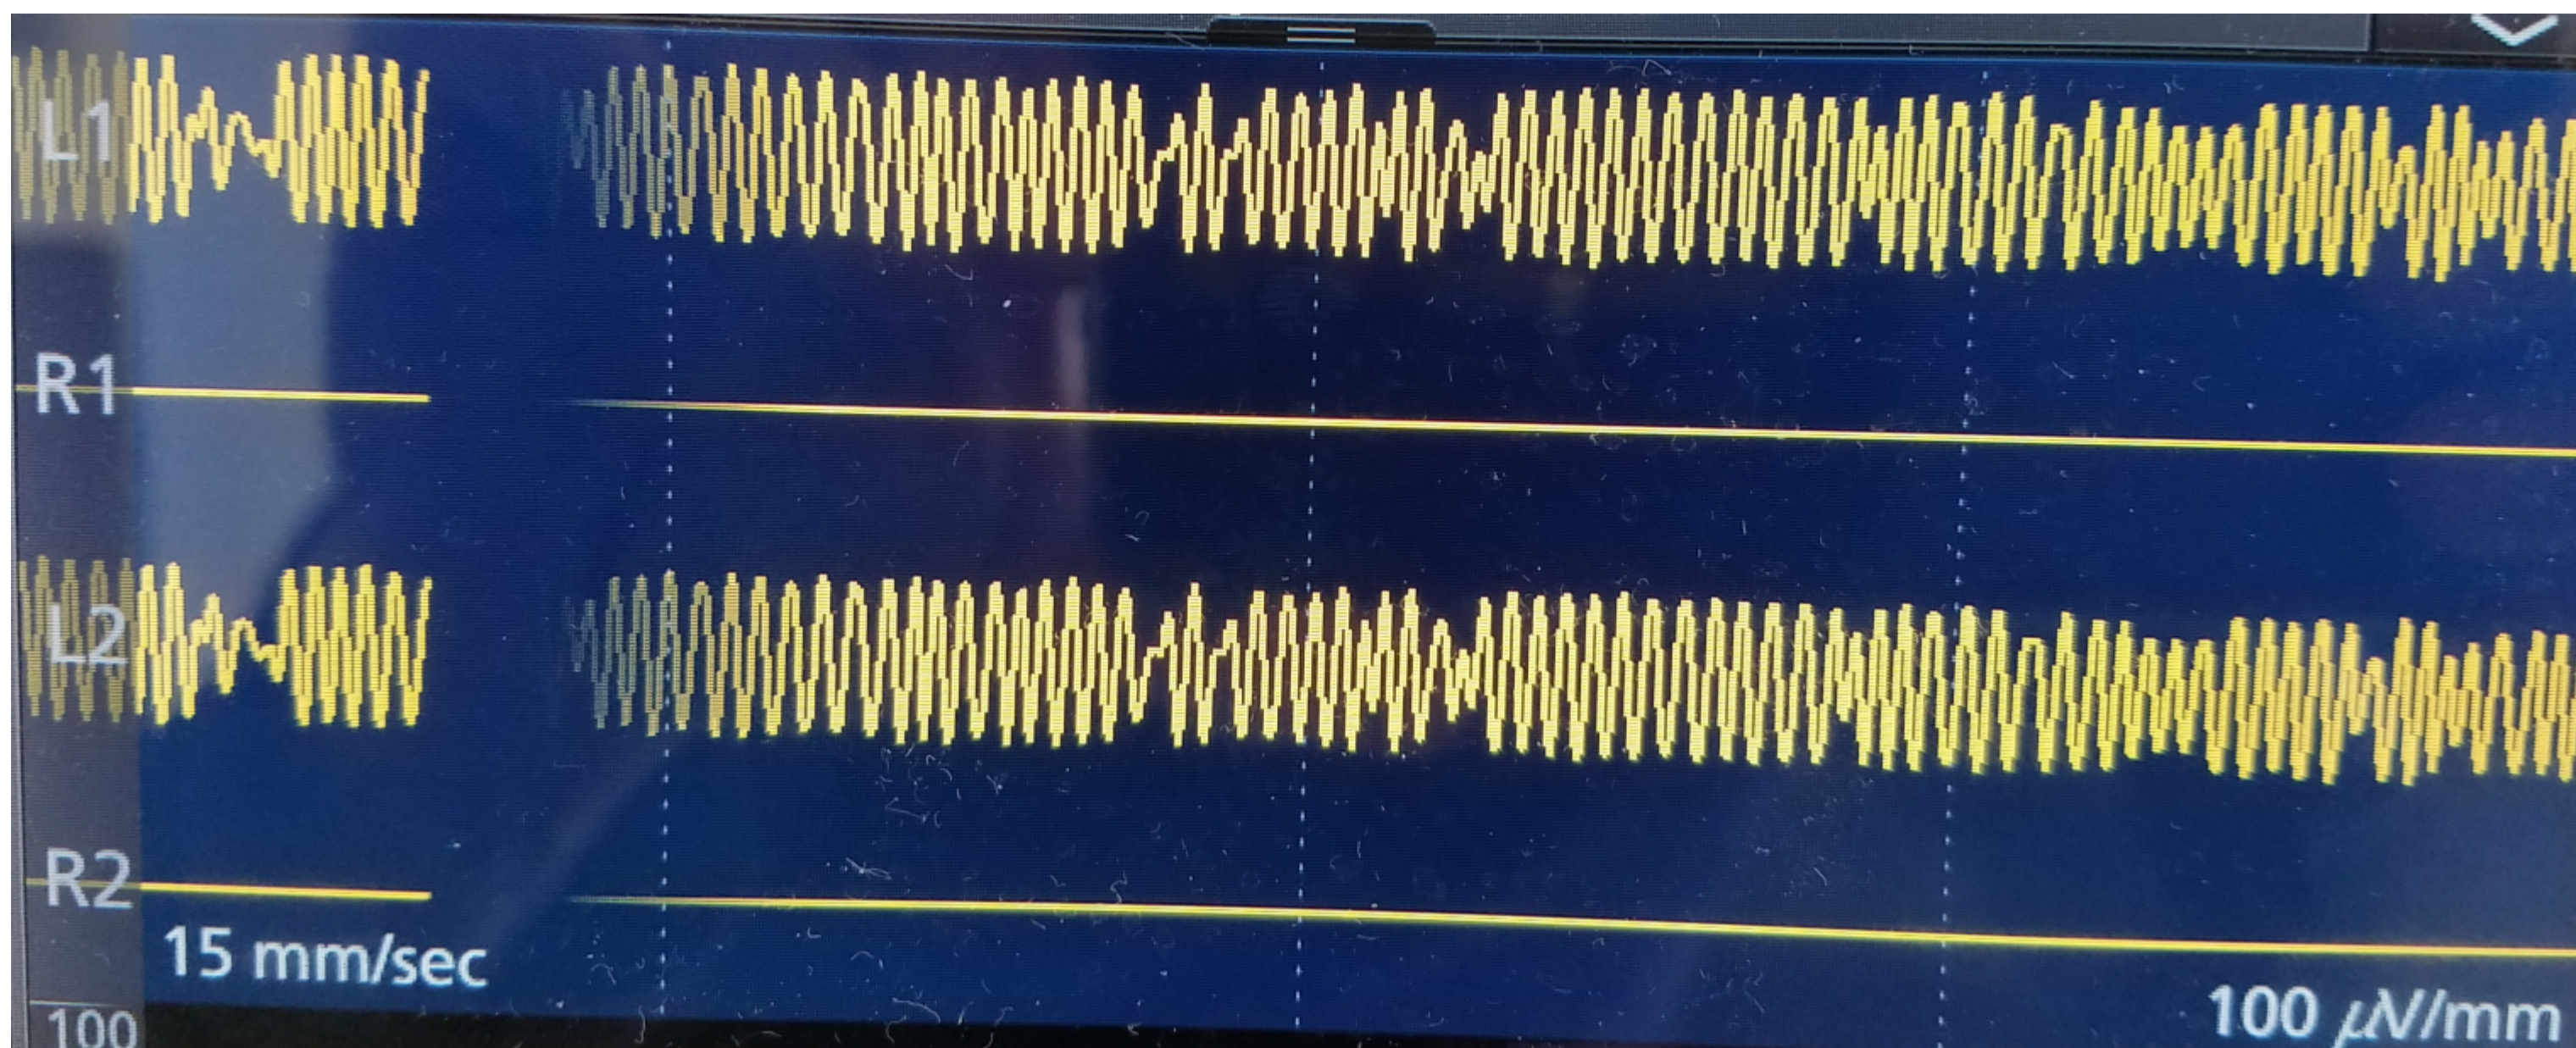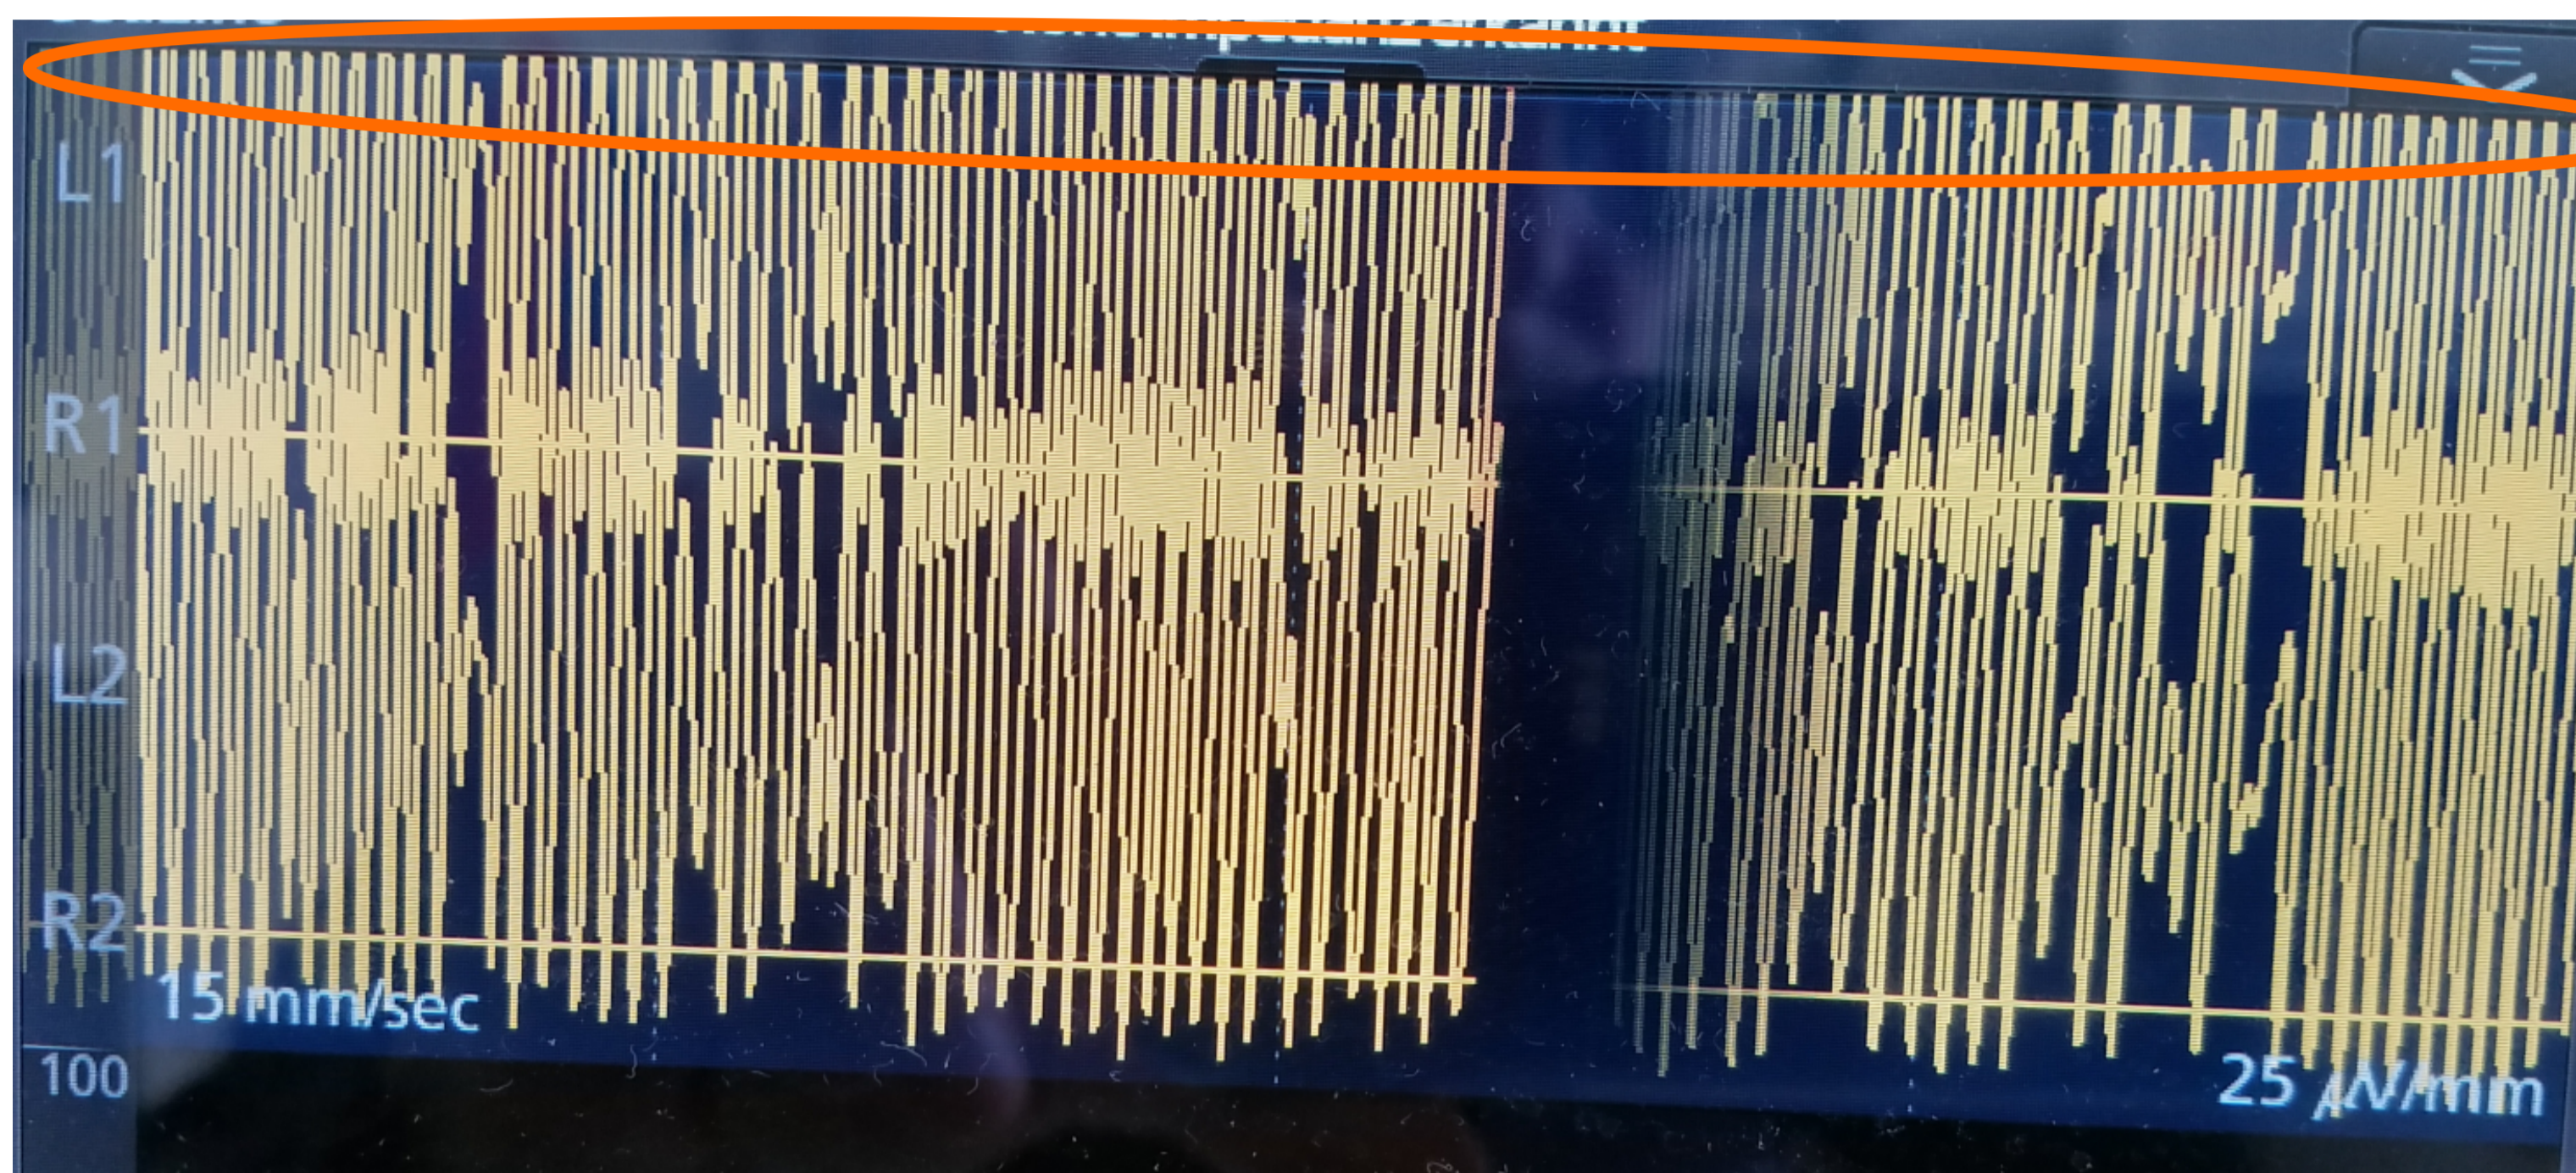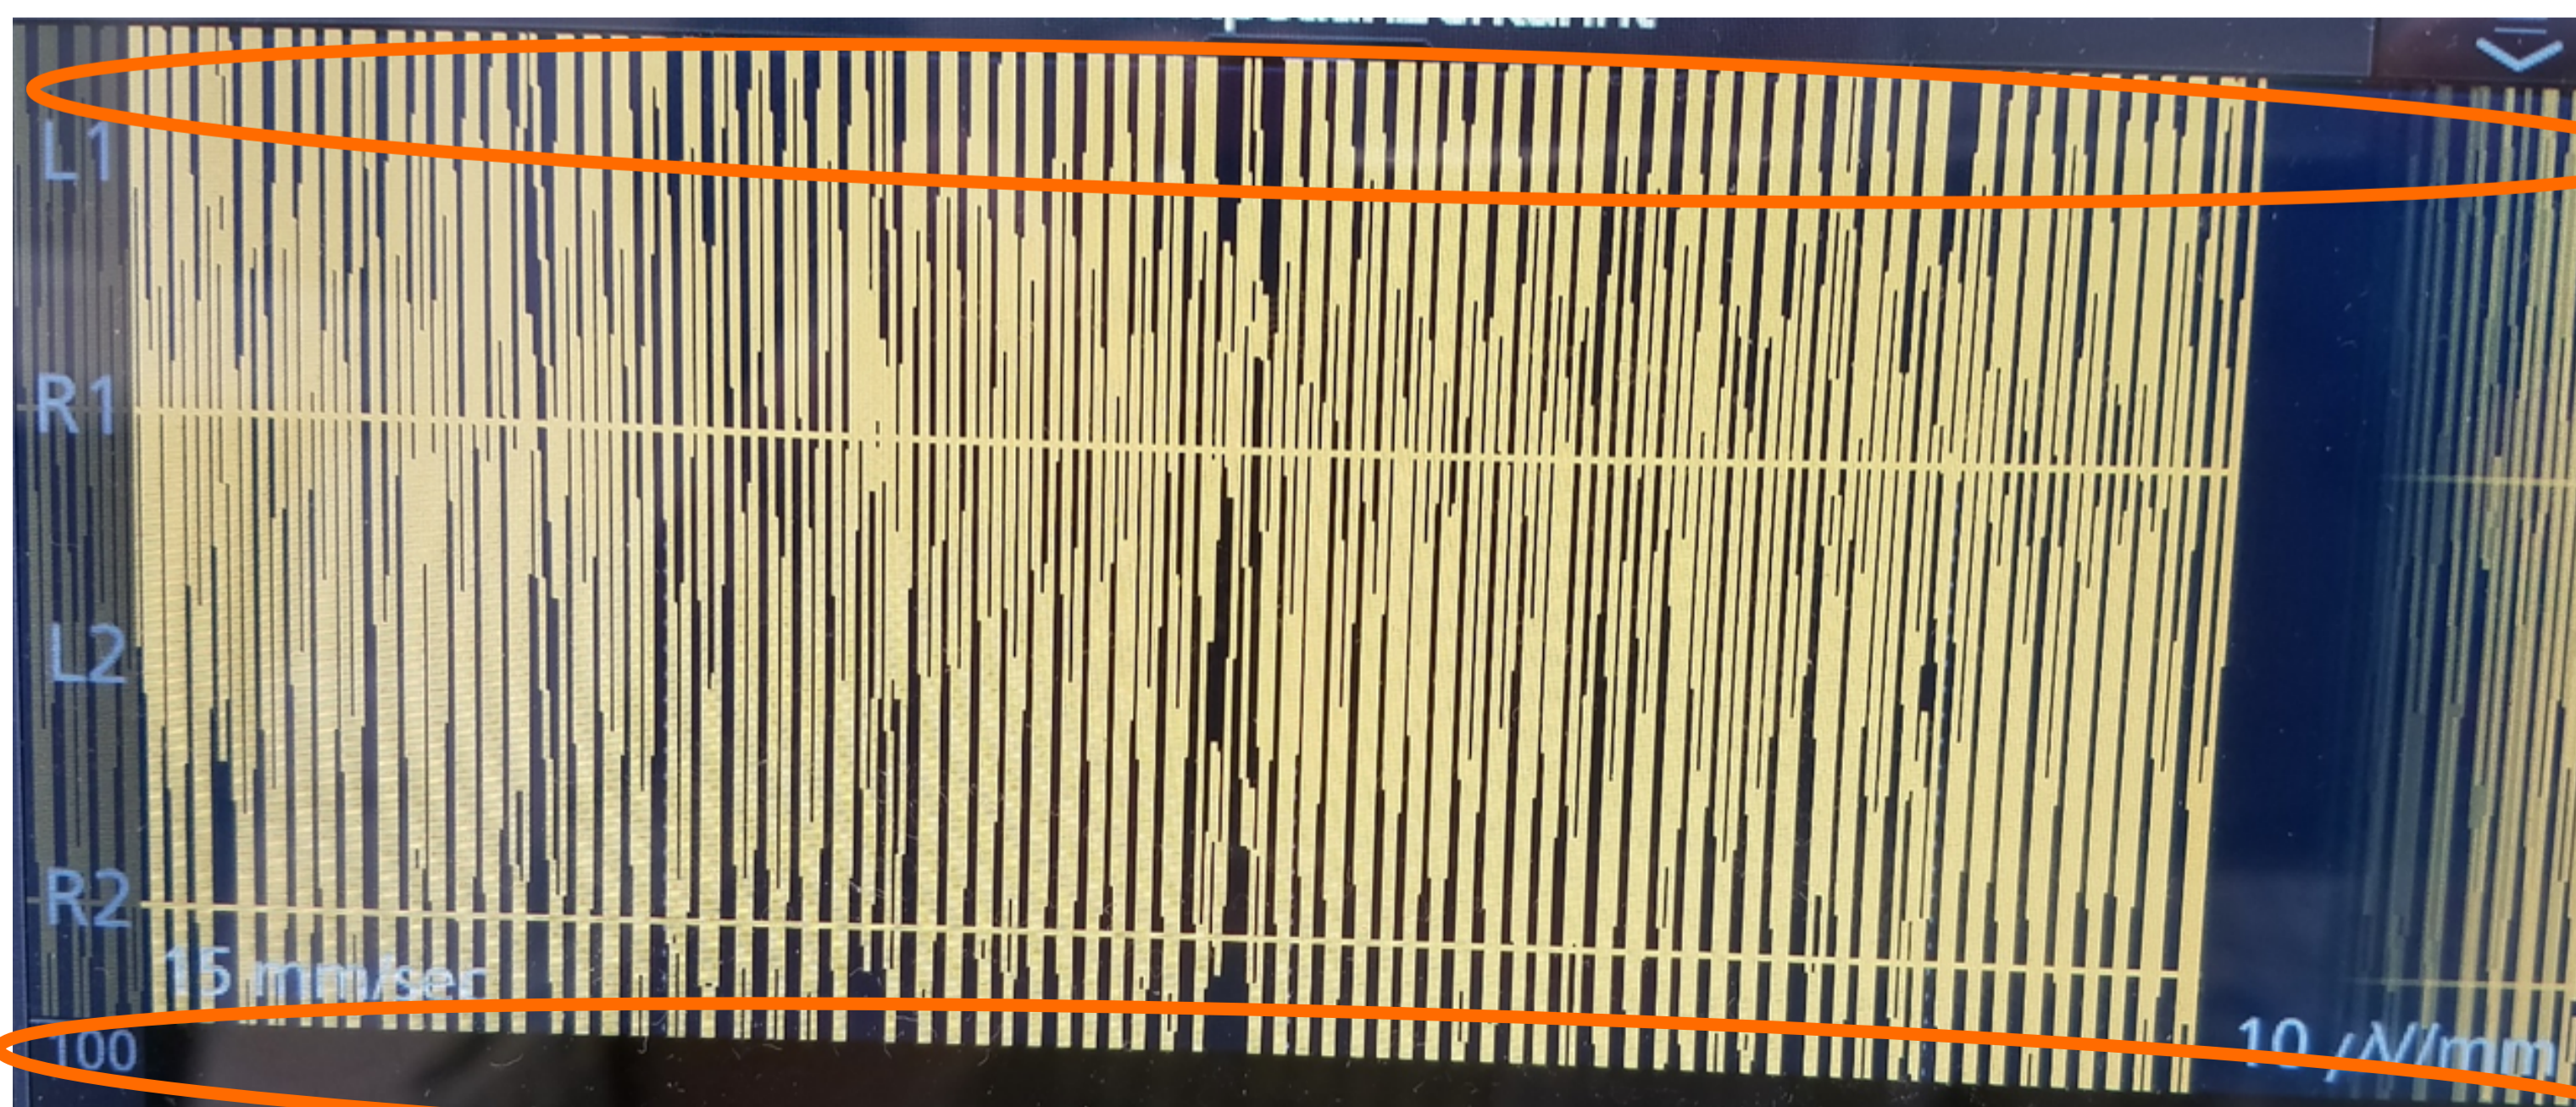

clipping
